# Supplementary material for: Diversity of Pectobacteriaceae Species in Potato Growing Regions in Northern Morocco
Source: MDPI journal article supplement (doi:10.3390/microorganisms8060895), 2020-06-13

This figure shows a relation tree of *gapA* barcode of Moroccan populations and other *Pectobacterium* and *Dickeya* strains (sequences were collected from NCBI database). The alignment was generated using ClustalW; the evolutionary history was inferred using the Neighbor-Joining method and the evolutionary distances were computed using the Maximum Composite Likelihood method. Phylogenetic analyses were conducted using MEGA7 software.

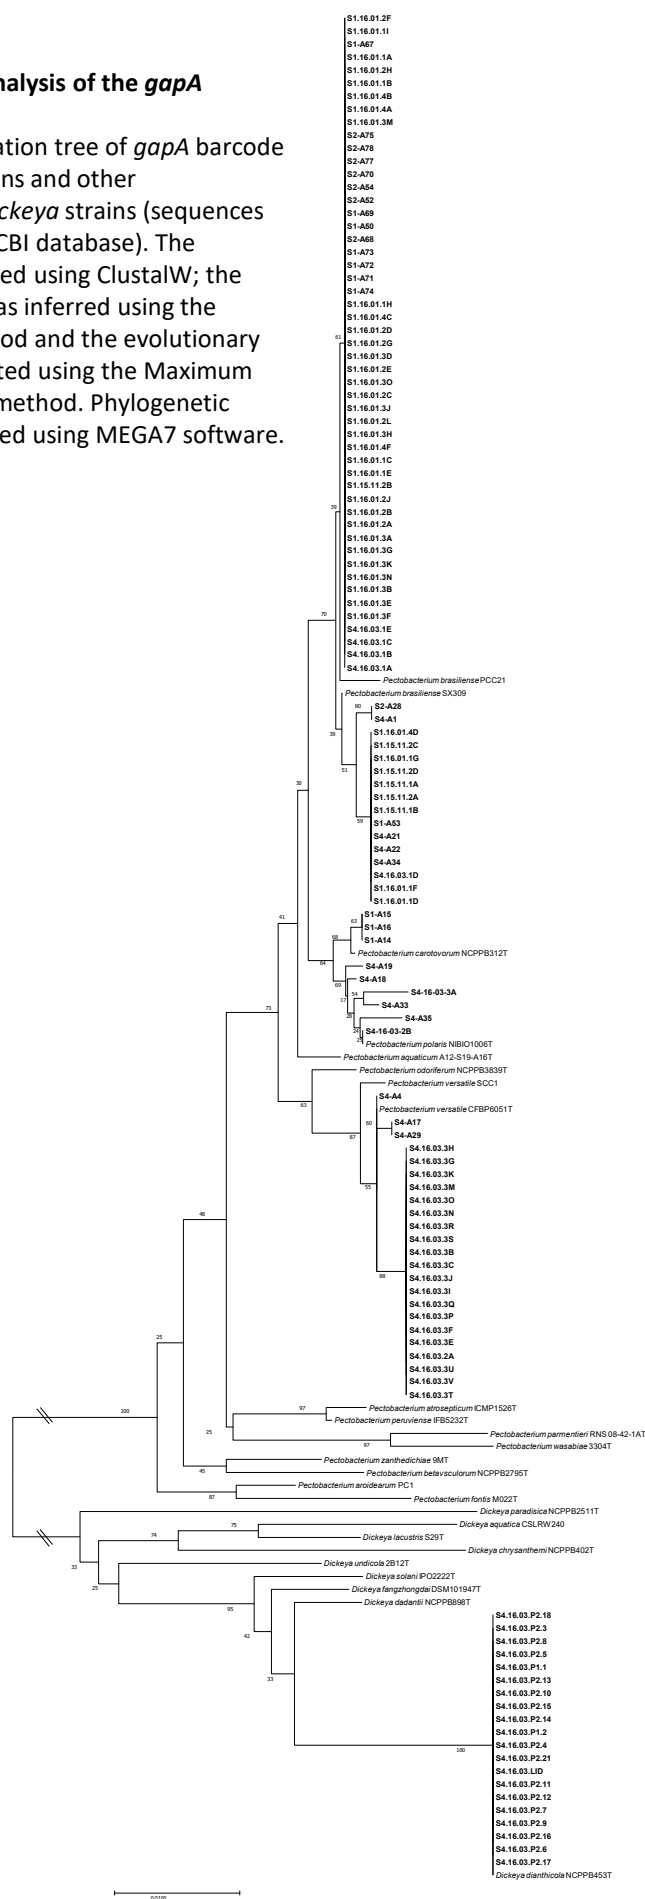

Supplement: s1 [file s1]
